# Supplementary material for: Investigating cellular heterogeneity at the single-cell level by the flexible and mobile extrachromosomal circular DNA
Source: PubMed Central journal article supplement (PMC9900259; doi:10.1016/j.csbj.2023.01.025), 2023-01-24

chr2-89823776-89842856

A

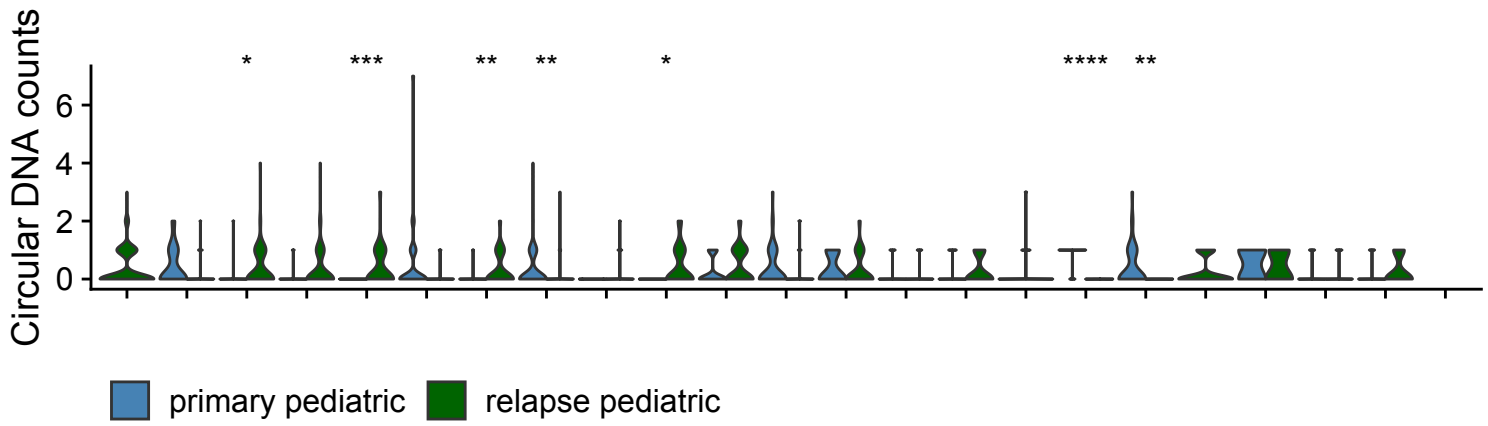

B

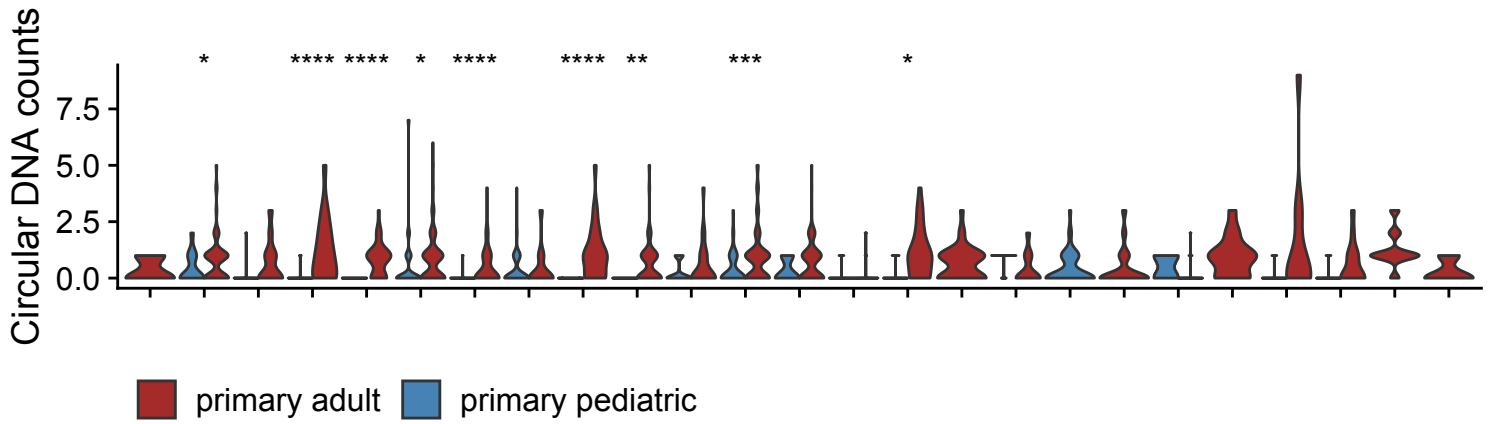

C

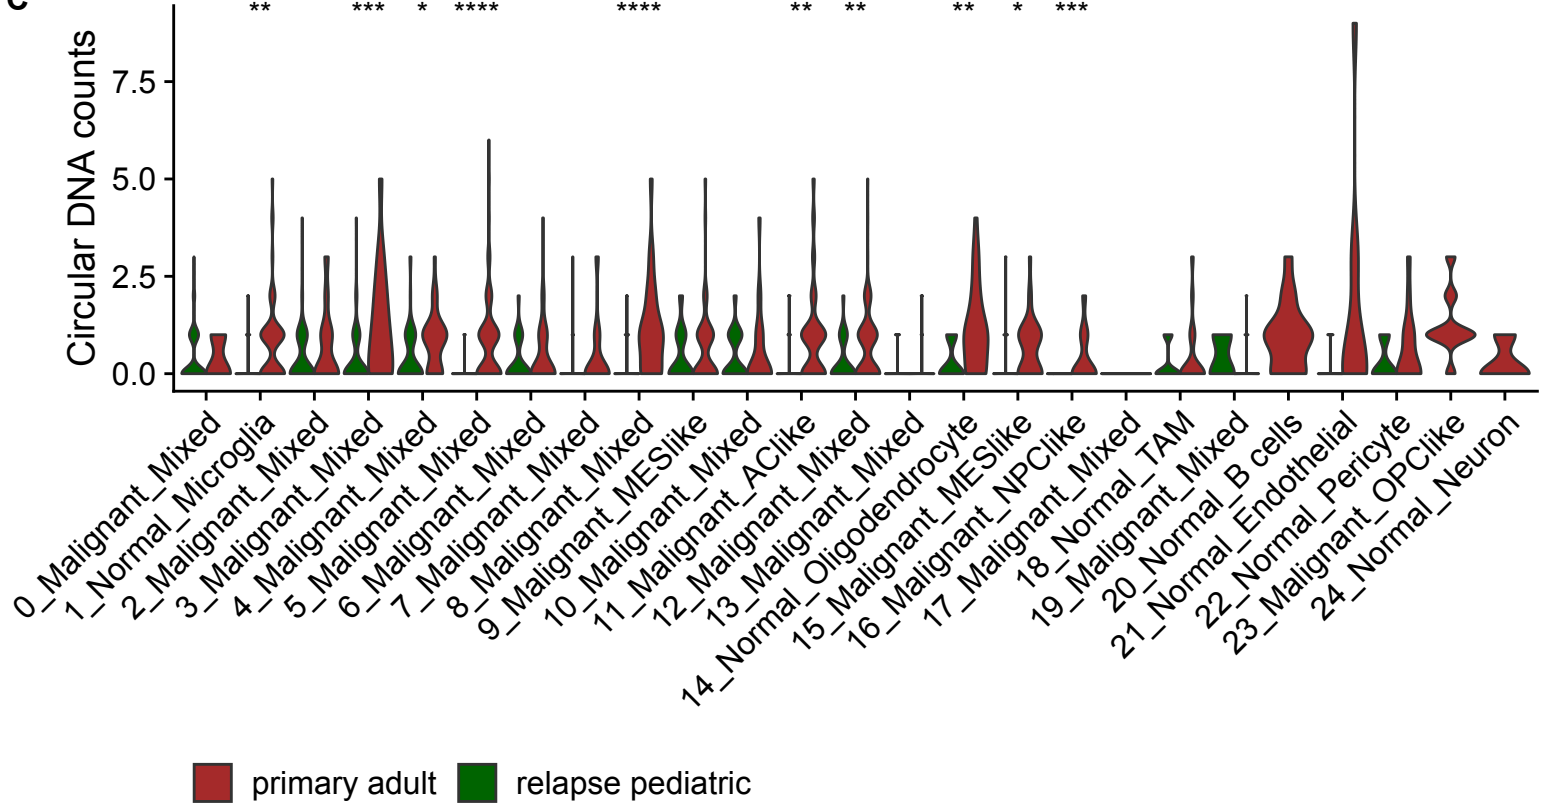

Supplement: mmc3.pdf [file mmc3.pdf]
