# Supplementary material for: Investigating cellular heterogeneity at the single-cell level by the flexible and mobile extrachromosomal circular DNA
Source: PubMed Central journal article supplement (PMC9900259; doi:10.1016/j.csbj.2023.01.025), 2023-01-24
Supplement: mmc4.pdf [file mmc4.pdf]

**ST 1 Sample information**

| GEO accession ID | Sample ID  | Condition           | Sex    | Age (years) | Histology    | Primary or Recurrent | Genetic alterations         |
|------------------|------------|---------------------|--------|-------------|--------------|----------------------|-----------------------------|
| GSE139136        | GSM4131776 | Adult               | Male   | 64          | Glioblastoma | Primary              | Wild type for IDH1 and IDH2 |
|                  | GSM4131777 | Adult               | Male   | 73          | Glioblastoma | Primary              | Wild type for IDH1 and IDH2 |
|                  | GSM4131778 | Adult               | Female | 52          | Glioblastoma | Primary              | Wild type for IDH1 and IDH2 |
|                  | GSM4131779 | Adult               | Male   | 62          | Glioblastoma | Primary              | Wild type for IDH1 and IDH2 |
| GSE163655        | GSM4983564 | Pediatric           | n/a    | n/a         | Glioblastoma | Primary              | n/a                         |
|                  | GSM4983566 | Pediatric           | n/a    | n/a         | Glioblastoma | Primary              | n/a                         |
| GSE163656        | GSM4983567 | Pediatric recurrent | n/a    | n/a         | Glioblastoma | Recurrent            | n/a                         |
|                  | GSM4983568 | Pediatric recurrent | n/a    | n/a         | Glioblastoma | Recurrent            | n/a                         |
|                  | GSM4983569 | Pediatric recurrent | n/a    | n/a         | Glioblastoma | Recurrent            | n/a                         |

n/a: not available.
