# Supplementary material for: Investigating cellular heterogeneity at the single-cell level by the flexible and mobile extrachromosomal circular DNA
Source: PubMed Central journal article supplement (PMC9900259; doi:10.1016/j.csbj.2023.01.025), 2023-01-24
Supplement: mmc5.pdf [file mmc5.pdf]

## Supplementary Information

Investigating cellular heterogeneity at the single-cell level by the flexible and mobile extrachromosomal circular DNA

### Table of contents

1. ST 1. Sample information
2. Supplementary Figures 1-3

### ST 1. Sample information

#### ST 1 Sample information

| GEO accession ID | Sample ID  | Condition           | Sex    | Age (years) | Histology    | Primary or Recurrent | Genetic alterations         |
|------------------|------------|---------------------|--------|-------------|--------------|----------------------|-----------------------------|
| GSE139136        | GSM4131776 | Adult               | Male   | 64          | Glioblastoma | Primary              | Wild type for IDH1 and IDH2 |
|                  | GSM4131777 | Adult               | Male   | 73          | Glioblastoma | Primary              | Wild type for IDH1 and IDH2 |
|                  | GSM4131778 | Adult               | Female | 52          | Glioblastoma | Primary              | Wild type for IDH1 and IDH2 |
|                  | GSM4131779 | Adult               | Male   | 62          | Glioblastoma | Primary              | Wild type for IDH1 and IDH2 |
| GSE163655        | GSM4983564 | Pediatric           | n/a    | n/a         | Glioblastoma | Primary              | n/a                         |
|                  | GSM4983566 | Pediatric           | n/a    | n/a         | Glioblastoma | Primary              | n/a                         |
| GSE163656        | GSM4983567 | Pediatric recurrent | n/a    | n/a         | Glioblastoma | Recurrent            | n/a                         |
|                  | GSM4983568 | Pediatric recurrent | n/a    | n/a         | Glioblastoma | Recurrent            | n/a                         |
|                  | GSM4983569 | Pediatric recurrent | n/a    | n/a         | Glioblastoma | Recurrent            | n/a                         |

n/a: not available.

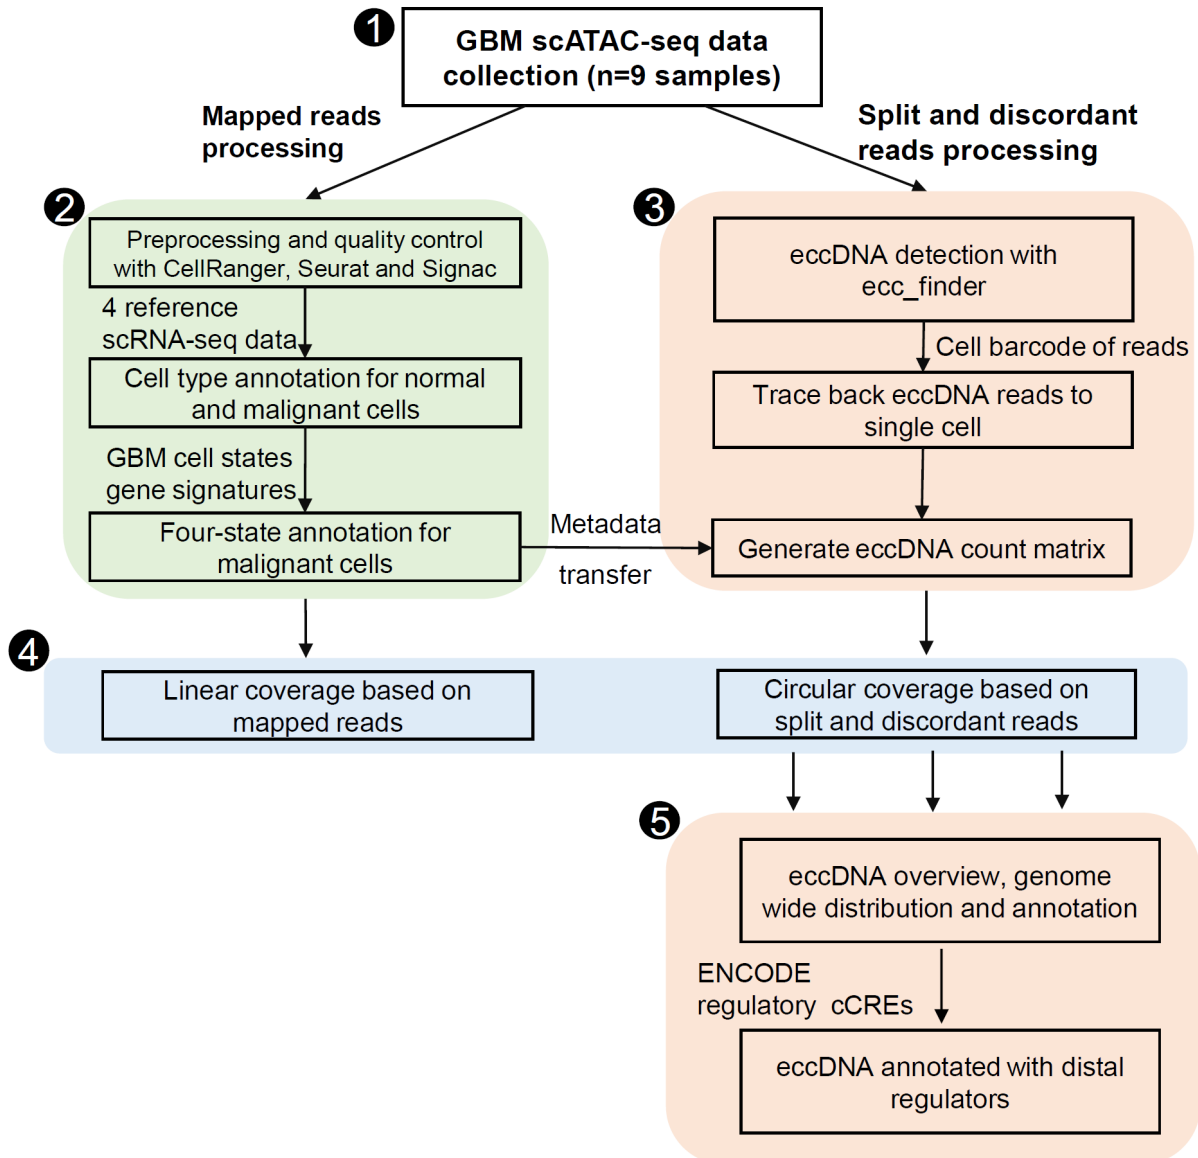

**SF 1. The methodological framework of eccDNA identification.** Step 1: scATAC-seq data collection. The data from a total of 9 GBM samples were collected. Step 2: Process and annotate the GBM scATAC-seq data based on mapped reads. Step 3: eccDNA detection and their single-cell origin traceback using ecc\_finder based on split and discordant reads. Step 4: Generate circular and linear coverage of common eccDNAs based on eccDNA count matrix and annotated scATAC-seq data. Step 5: Provide the genome distribution overview and annotation of eccDNA mapped regions.

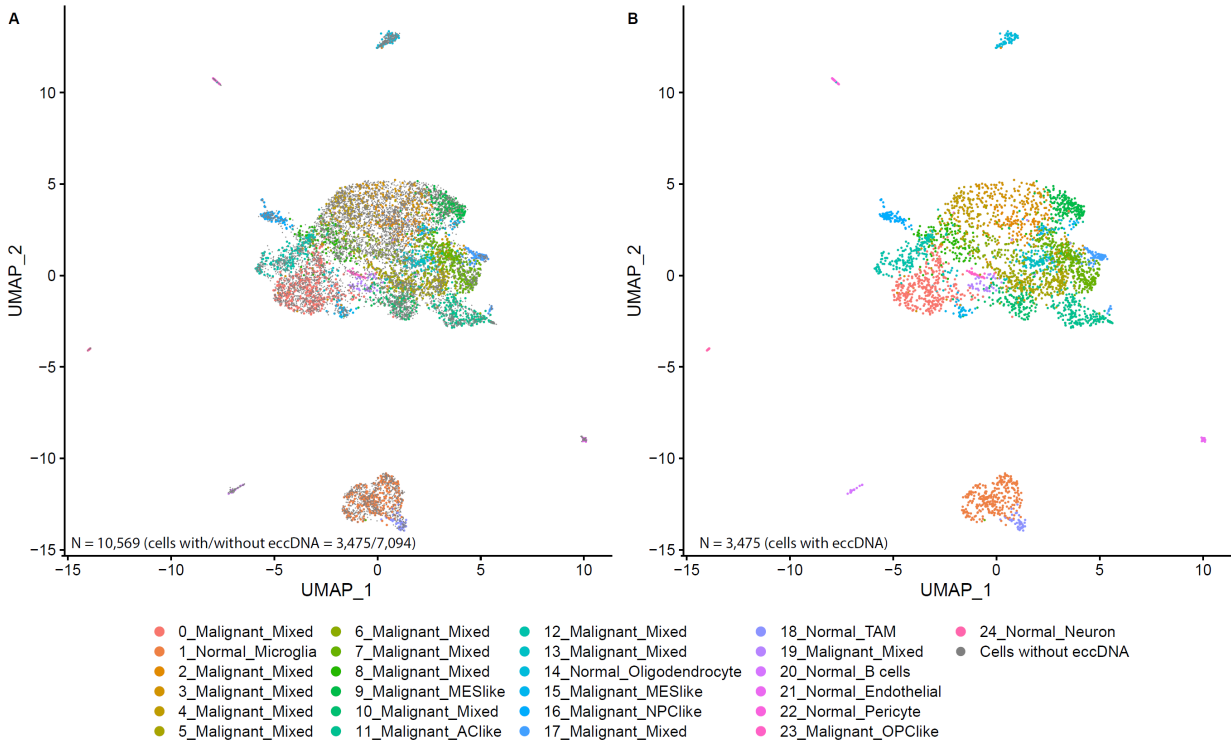

**SF 2. Overview of cell clusters in the integrated scATAC-seq GBM data. A.** UMAP of all cells passing quality controls. Cells harboring eccDNAs are colored by annotated cell types and cell states. Cells without eccDNAs are colored in grey. **B.** UMAP of cells with eccDNA colored by annotated cell types and cell states.

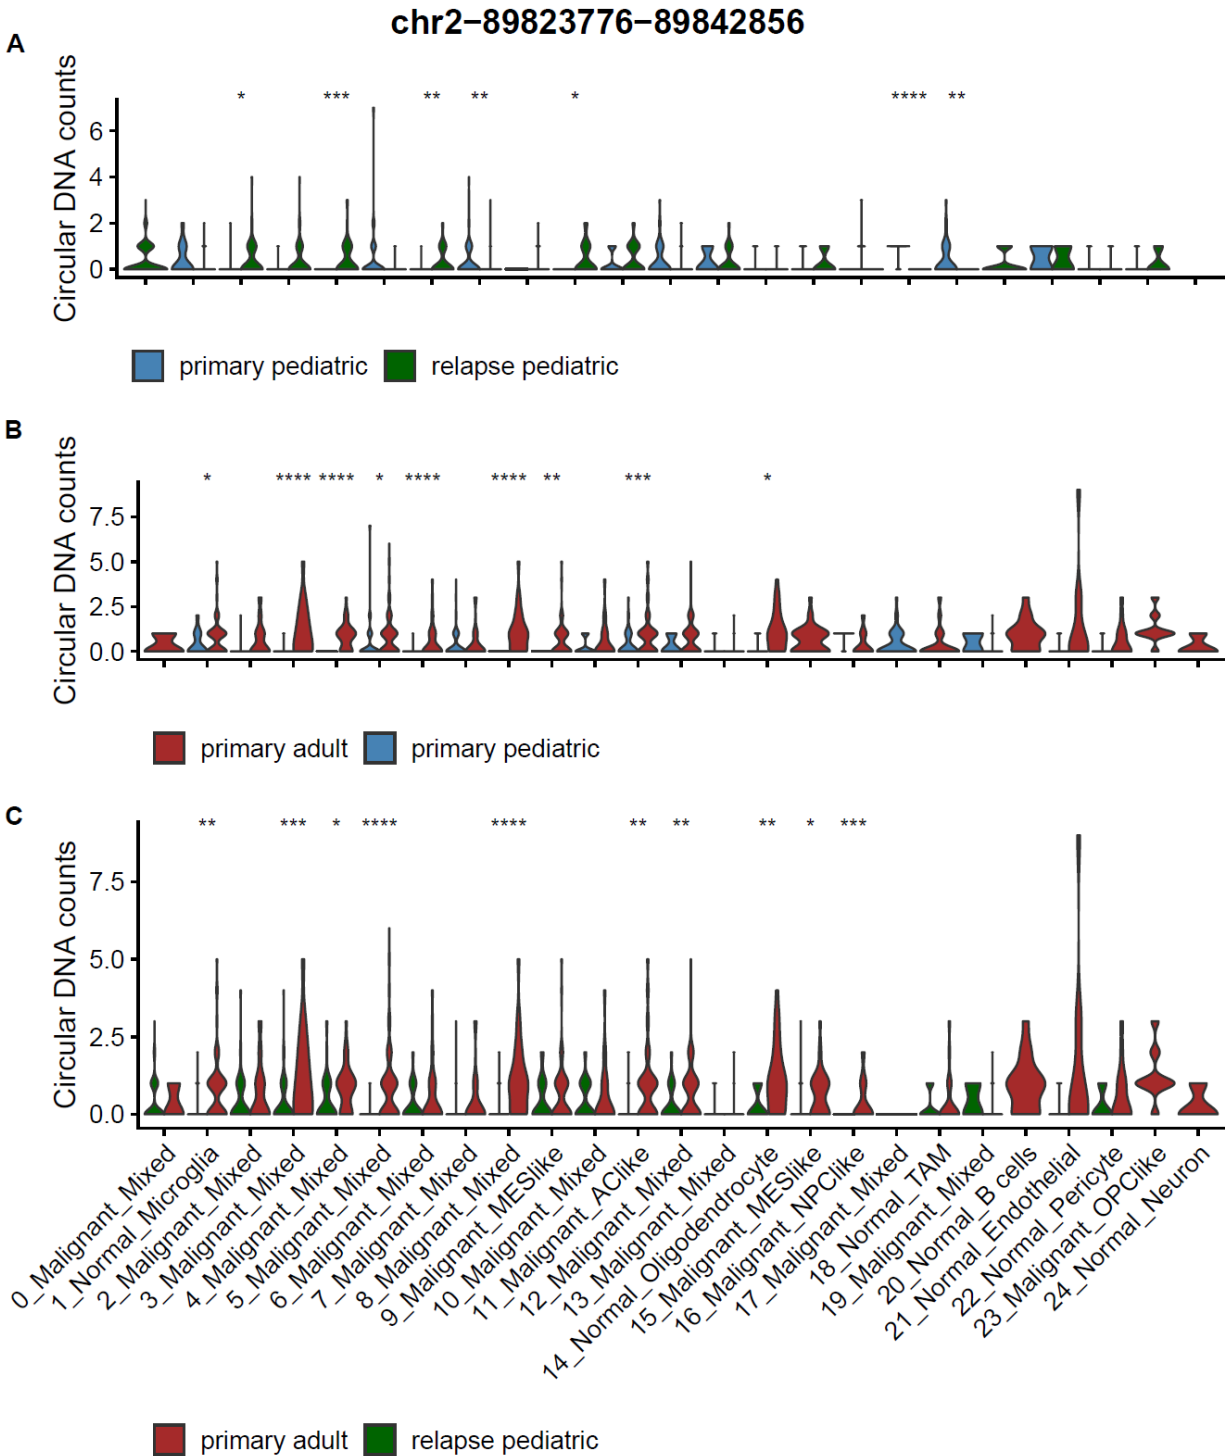

**SF 3. Condition-wise comparison of circular coverage of eccDNA at the locus chr2:89823776-89842856. A.** Comparison between primary pediatric and relapse pediatric GBMs. **B.** Comparison between primary adult and primary pediatric GBMs. **C.** Comparison between primary adult and relapse pediatric GBMs. Cell cluster names plotted on the x-axis are organized in the format of [Cluster ID]\_[Tumor or normal cell]\_[cell type or cell states]. Mixed: the

malignant cluster is a mixture of at least two cell states out of MESlike, OPClike, NPClike and ACl like. Abbreviations: TAM: tumor-associated macrophage; NPClike, neural-progenitor-like; OPClike, oligodendrocyte-progenitor-like; ACl like, astrocyte-like; MESlike, mesenchymal-like. Wilcox test was applied to compare the eccDNA distribution in each cell type between two conditions in each pair. \*\*\*\*:  $p < 0.0001$ . \*\*\*:  $p < 0.001$ . \*\*:  $p < 0.01$ . \*:  $p < 0.05$ .
